# Supplementary material
Source: PubMed Central journal article supplement (PMC6003402)
Supplement: Supp_Fig2.pdf [file Supp_Fig2.pdf]

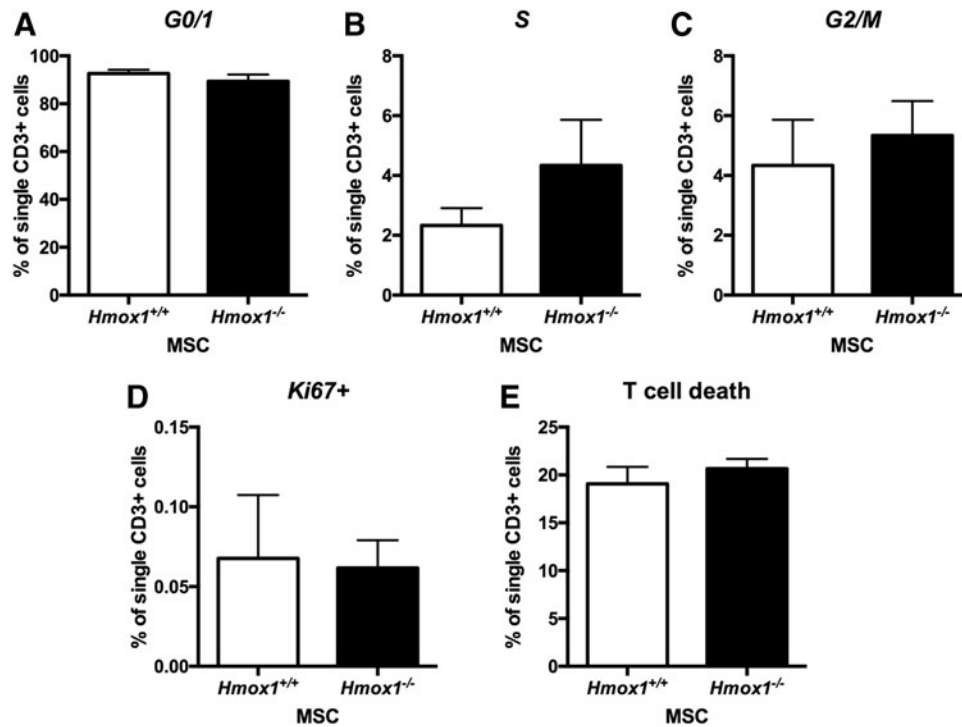

**SUPPLEMENTARY FIG. S2. Lack of Hmox1 in MSC does not affect their abilities to influence T cell proliferation or death.** Percentage of single CD3<sup>+</sup> T cells in G0/1 (A), S (B), or G2/M (C) cell cycle phase after the 24 h of co-culture with MSC Hmox1<sup>+/+</sup> or Hmox1<sup>-/-</sup>. Percentage of Ki67<sup>+</sup>-expressing CD3<sup>+</sup> T cells (D) or Annexin V<sup>+</sup> CD3<sup>+</sup> cells (E) after the 24 h of co-culture with MSC Hmox1<sup>+/+</sup> or Hmox1<sup>-/-</sup>. Data shown as mean ± SD.
