# Supplementary material
Source: PubMed Central journal article supplement (PMC6003402)
Supplement: Supp_Fig3.pdf [file Supp_Fig3.pdf]

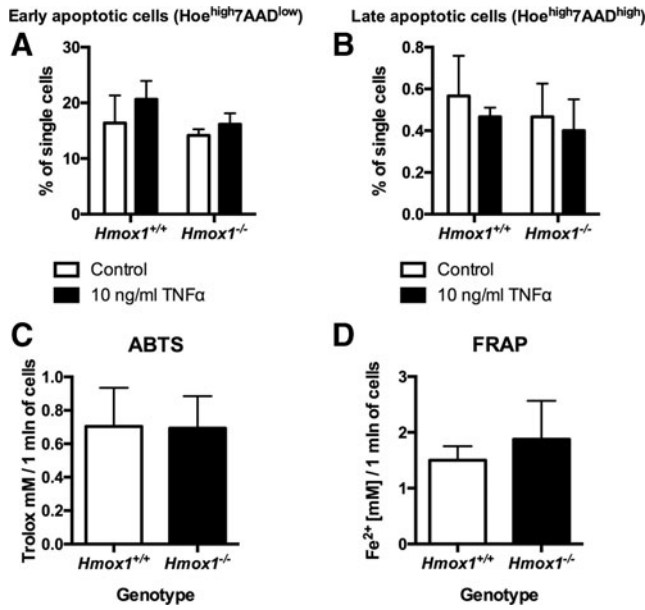

**SUPPLEMENTARY FIG. S3. MSC *Hmox1*<sup>-/-</sup> or *Hmox1*<sup>+/+</sup> do not differ in their sensitivity to TNF $\alpha$  or in total antioxidant capacity.** Early (A) and late (B) apoptotic cells in MSC *Hmox1*<sup>-/-</sup> or *Hmox1*<sup>+/+</sup> stimulated for 24 h with 10 ng/ml TNF $\alpha$ . Total antioxidant capacity in conditioned media from MSC *Hmox1*<sup>+/+</sup> or *Hmox1*<sup>-/-</sup> measured with ABTS (C) or FRAP (D) methods. ABTS, 2,2'-azino-bis(3-ethylbenzothiazoline-6-sulphonic acid); FRAP, ferric-reducing antioxidant power.
