# Supplementary material
Source: PubMed Central journal article supplement (PMC6003402)
Supplement: Supp_Fig4.pdf [file Supp_Fig4.pdf]

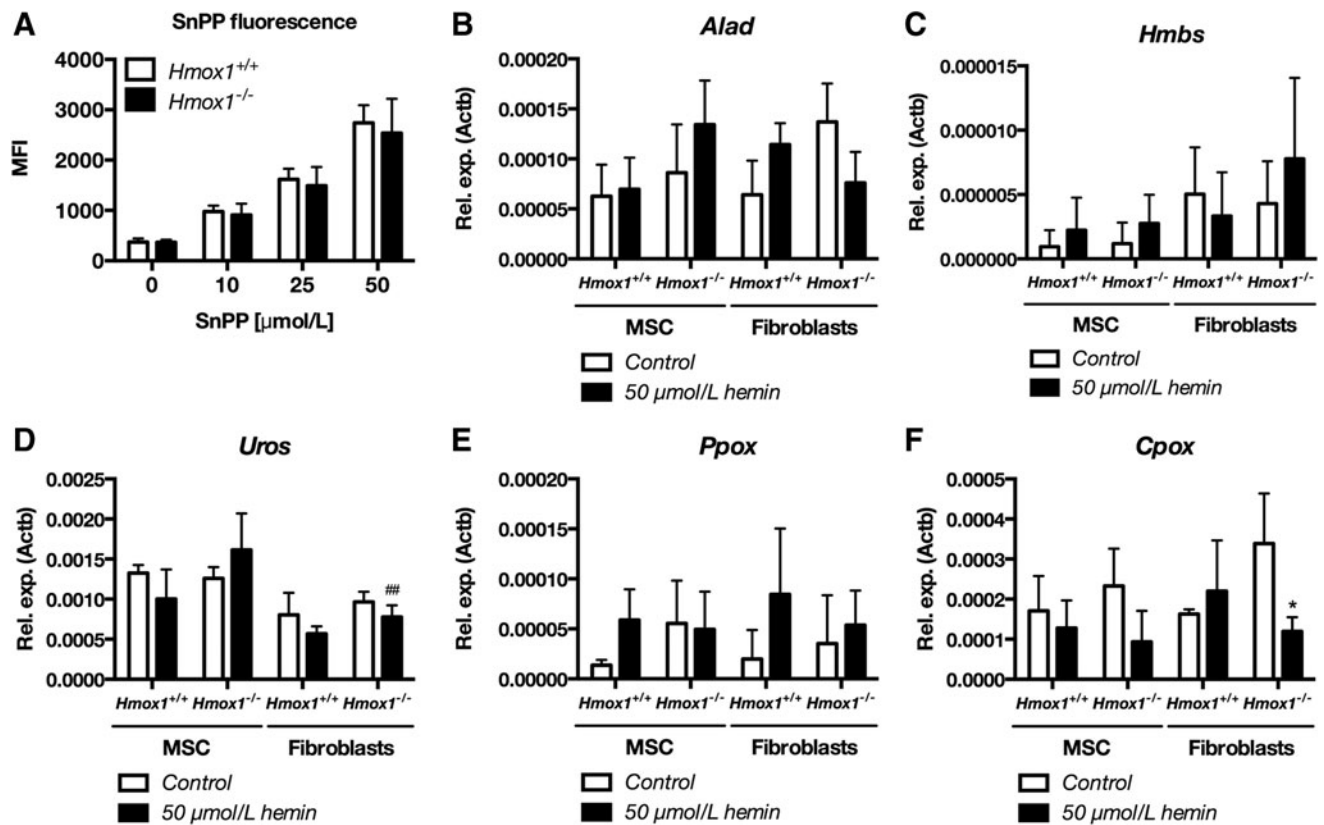

**SUPPLEMENTARY FIG. S4. Lack of Hmox1 does not affect the uptake of SnPP by MSC and has only minor effect on expression of Uros and Cpox in fibroblasts treated with hemin.** SnPP fluorescence in  $Hmox1^{+/+}$  or  $Hmox1^{-/-}$  MSCs assessed with flow cytometry,  $N=3$  (A). Expression of *Alad* (B), *Hmbs* (C), *Uros* (D), *Ppox* (E), and *Cpox* (F), in  $Hmox1^{+/+}$  or  $Hmox1^{-/-}$  MSCs or fibroblasts stimulated for 6 h with hemin (50  $\mu\text{mol/L}$ ). Data shown as mean  $\pm$  SD,  $*p < 0.05$  hemin-treated cells versus control;  $^{##}p < 0.01$  MSCs versus fibroblasts. Two-way ANOVA with Bonferroni post-test,  $N=3$ . ANOVA, analysis of variance; SnPP, tin protoporphyrin IX.
