# Supplementary material
Source: PubMed Central journal article supplement (PMC6003402)
Supplement: Supp_Fig5.pdf [file Supp_Fig5.pdf]

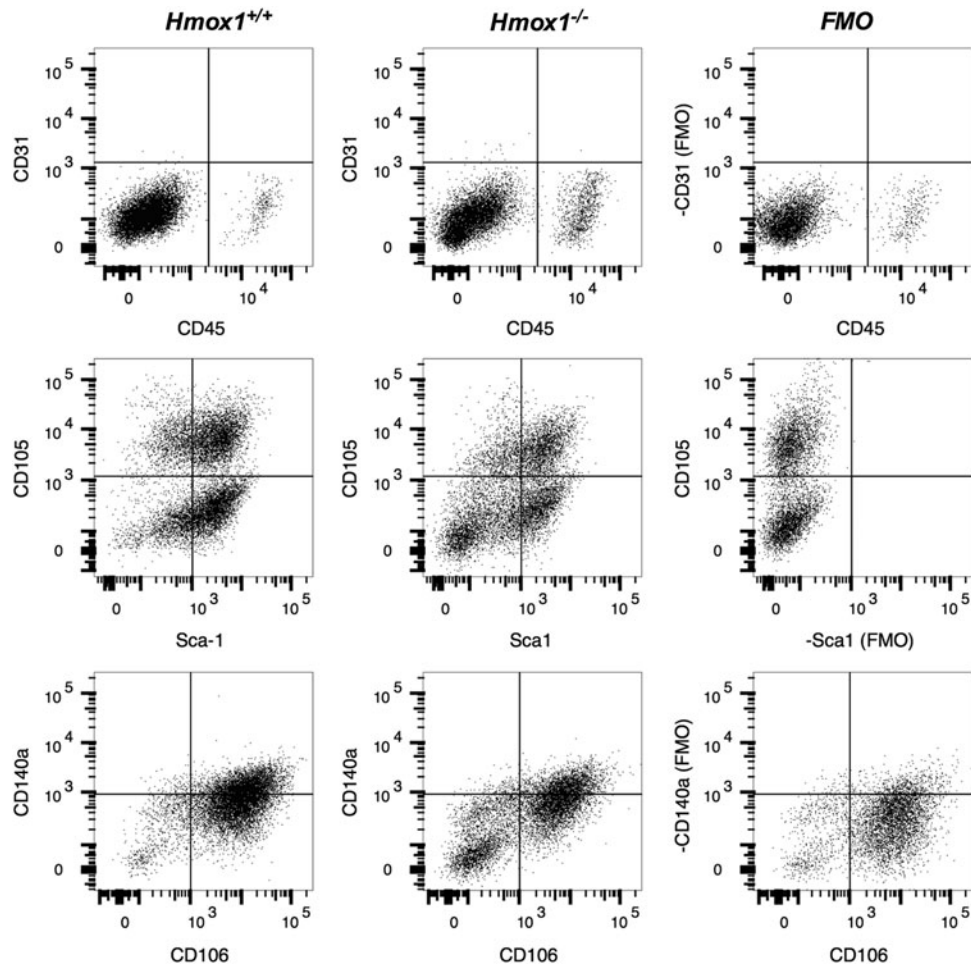

**SUPPLEMENTARY FIG. S5. Fibroblasts *Hmox1*<sup>+/+</sup> or *Hmox1*<sup>-/-</sup> have similar phenotype, which resembles one of bone marrow MSCs.** Phenotype of mouse tail fibroblasts isolated from *Hmox1*<sup>+/+</sup> or *Hmox1*<sup>-/-</sup> mice and FMO controls for the proper gating. FMO, fluorescence minus one.
