# Supplementary material
Source: PubMed Central journal article supplement (PMC6003402)
Supplement: Supp_Fig6.pdf [file Supp_Fig6.pdf]

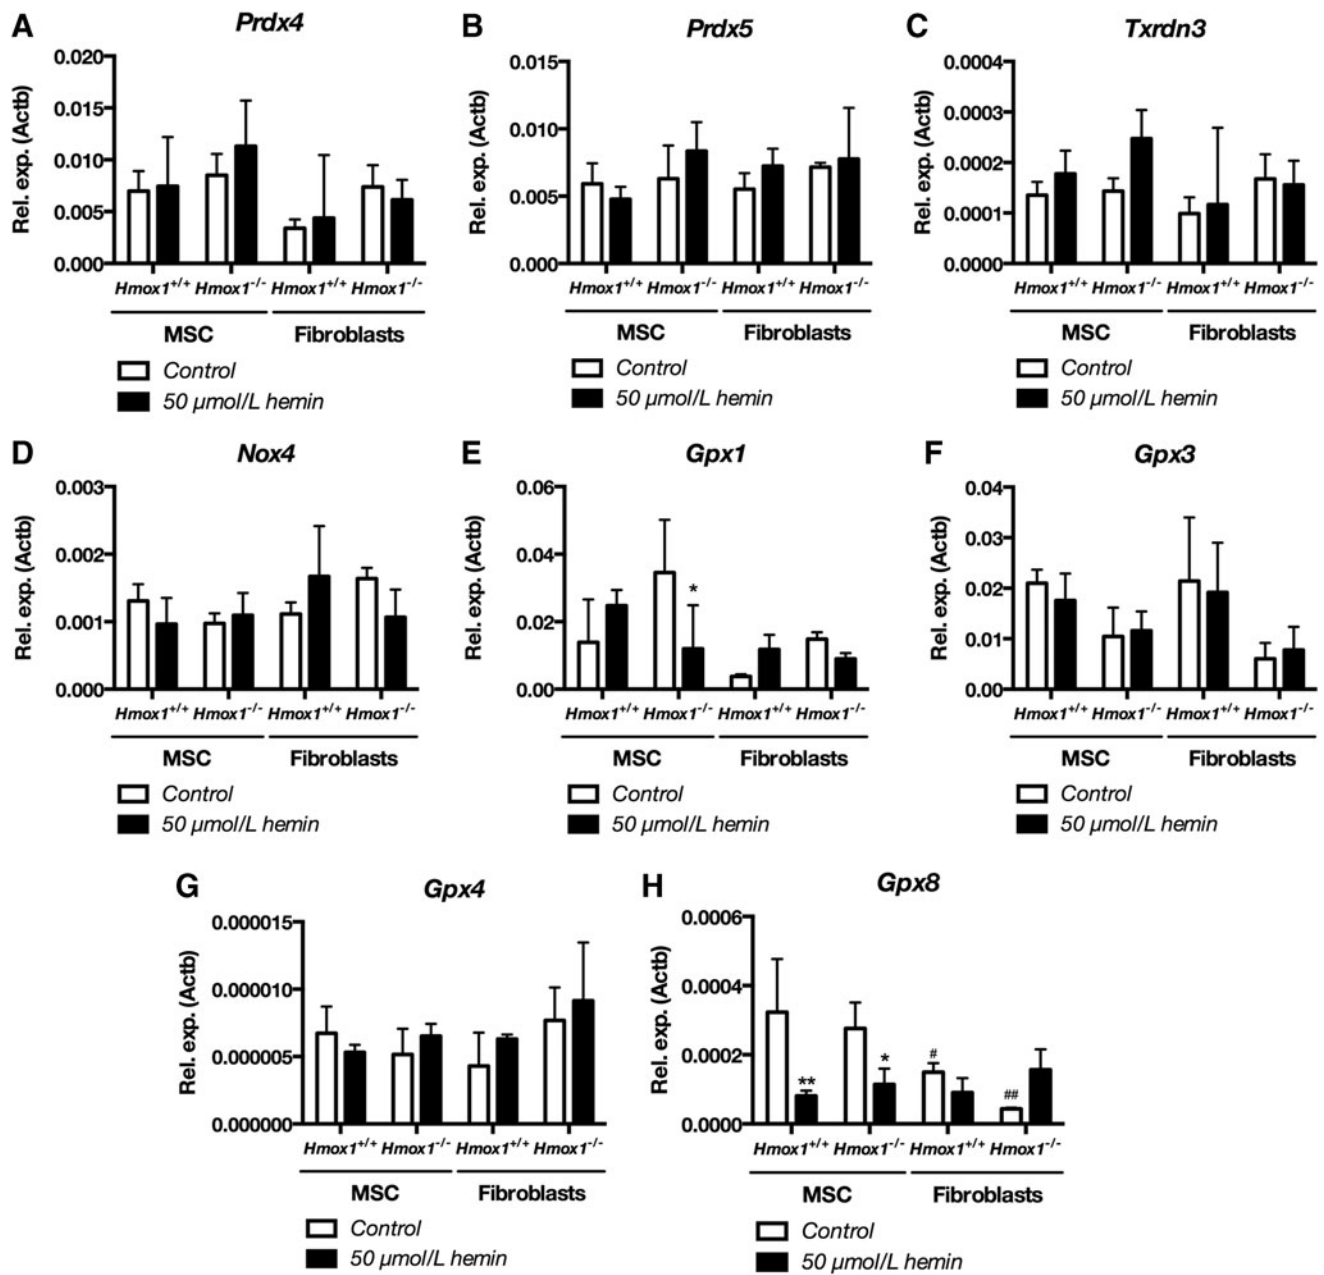

**SUPPLEMENTARY FIG. S6. Hemin changes expression of Gpx8 in both MSC  $Hmox1^{+/+}$  or  $Hmox1^{-/-}$ .** Expression of *Prdx4* (A), *Prdx5* (B), *Txrdn3* (C), *Nox4* (D), *Gpx1* (E), *Gpx3* (F), *Gpx4* (G), and *Gpx8* (H) in  $Hmox1^{+/+}$  or  $Hmox1^{-/-}$  MSCs or fibroblasts stimulated for 6 h with hemin (50  $\mu\text{mol/L}$ ). Data shown as mean  $\pm$  SD, \* $p < 0.05$ , \*\* $p < 0.01$  hemin-treated cells vs control; # $p < 0.05$ , ## $p < 0.01$  MSCs vs fibroblasts. Two-way ANOVA with Bonferroni post-test,  $N = 3$ .
