# Supplementary material
Source: PubMed Central journal article supplement (PMC6003402)
Supplement: Supp_Fig7.pdf [file Supp_Fig7.pdf]

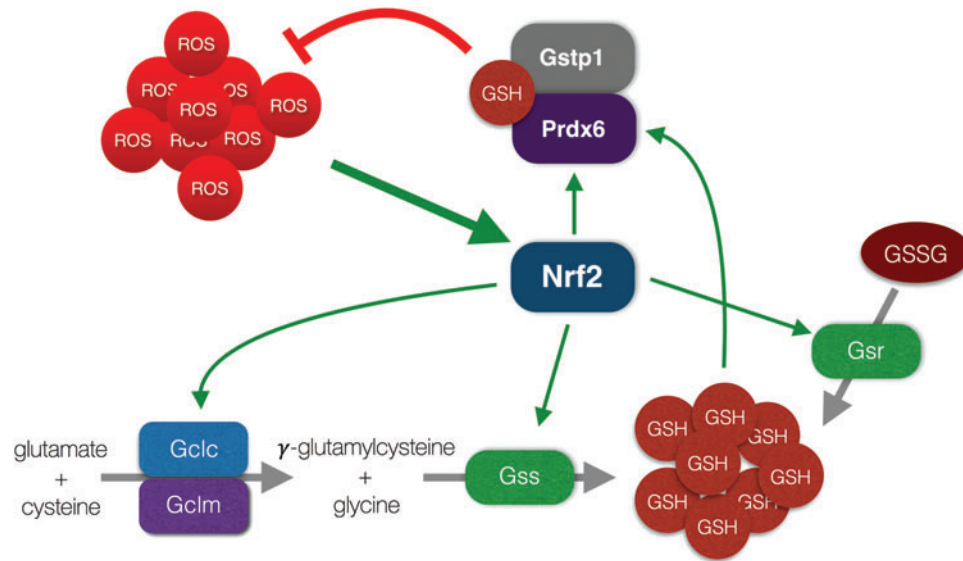

**SUPPLEMENTARY FIG. S7. Proposed mechanism of MSC resistance to oxidative stress involves rapid upregulation of Nrf2-regulated genes.** MSC *Hmox1*<sup>-/-</sup> rapidly upregulate genes that are quintessential for the antioxidant response. Nrf2 induces the expression of enzymes involved in glutathione synthesis and metabolism as well as peroxiredoxin 6. GSH, reduced glutathione; GSSG, oxidized glutathione.
