# Supplementary material
Source: PubMed Central journal article supplement (PMC6003402)
Supplement: Supp_Table1.pdf [file Supp_Table1.pdf]

SUPPLEMENTARY TABLE S1. SEQUENCES OF PRIMERS USED FOR MOUSE GENES

| <i>Gene</i>                | <i>Primer</i> | <i>Sequence 5'–3'</i>       | <i>Product [bp]</i> | <i>mRNA ID</i>              |
|----------------------------|---------------|-----------------------------|---------------------|-----------------------------|
| <i>Mmu_Acta2</i>           | For           | CAGGTGATCACCATTGGAAACGAACG  | 164                 | NM_007392.3                 |
|                            | Rev           | GACAGGACGTTGTTAGCATAGAGATCC |                     |                             |
| <i>Mmu_Actb</i>            | For           | TCCTTCGTTGCCGGTCCACA        | 93                  | NM_007393.5                 |
|                            | Rev           | GCTTTGCACATGCCGGAGCC        |                     |                             |
| <i>Mmu_Alad</i>            | For           | GTGGGCTTGCGCTTTTAGAG        | 199                 | NM_008525.4                 |
|                            | Rev           | CGAAGCAGTGGGTGAAAGTA        |                     |                             |
| <i>Mmu_Alas1</i>           | For           | TCTATATTTAGGGCCGCCAG        | 176                 | NM_020559.2                 |
|                            | Rev           | TCGGGATAAGAATGGGCATC        |                     |                             |
| <i>Mmu_Cat</i>             | For           | TGACATGGTCTGGGACTTCTGG      | 192                 | NM_009804.2                 |
|                            | Rev           | TTGATGCCCTGGTCCGGTCTT       |                     |                             |
| <i>Mmu_Cpox</i>            | For           | CACTGCGATGACTCCTACAC        | 93                  | NM_007757.2                 |
|                            | Rev           | GCCCCGATCATAACAACA          |                     |                             |
| <i>Mmu_Eef2(Ef2)</i>       | For           | GACATACCAAGGGTGTGCA         | 214                 | NM_007907.2                 |
|                            | Rev           | TCAGCACACTGGCATAGAGG        |                     |                             |
| <i>Mmu_Fabp4</i>           | For           | TGTCTCCAGTGAAAACCTTCG       | 119                 | NM_024406.2                 |
|                            | Rev           | TGACCAAAATCCCCATTTACG       |                     |                             |
| <i>Mmu_Fech</i>            | For           | ACCACATTGAGACGCTCTAC        | 88                  | NM_007998.6                 |
|                            | Rev           | TCCGCTCTTCTGATGTTCTC        |                     |                             |
| <i>Mmu_Fth1</i>            | For           | CTTCGAGCCTGAGCCCTTTG        | 157                 | NM_010239.2                 |
|                            | Rev           | CAGGTTGATCTGGCGGTTGA        |                     |                             |
| <i>Mmu_Gclc</i>            | For           | GGGCTGCTGTCCCAAG            | 223                 | NM_010295.2                 |
|                            | Rev           | CAAGAACATCGCTCCATTC         |                     |                             |
| <i>Mmu_Gclm</i>            | For           | GTTGCTATAGGCACCTCTGA        | 125                 | NM_008129.4                 |
|                            | Rev           | GTCAAATCTGGTGGCATCAC        |                     |                             |
| <i>Mmu_Gpx1</i>            | For           | ACGATCCGGGACTACACC          | 190                 | NM_008160.6                 |
|                            | Rev           | ACTTCTCAAACAATGTAAAATTGG    |                     |                             |
| <i>Mmu_Gpx3</i>            | For           | TTTAAGCAGTATGCAGGCAA        | 106                 | NM_008161.3                 |
|                            | Rev           | GCCCAAGTCTCTCTGTAGTG        |                     |                             |
| <i>Mmu_Gpx4</i>            | For           | CCGATATGCTGAGTGTGGTT        | 264                 | NM_008162.2                 |
|                            | Rev           | ACGCAGCCGTTCTTATCAAT        |                     | NM_001037741.2              |
| <i>Mmu_Gpx8</i>            | For           | AAGATTTTAGGGCCGGAAGC        | 116                 | NM_027127.2                 |
|                            | Rev           | TTCACGACTTGTCCTCAG          |                     |                             |
| <i>Mmu_Gsr</i>             | For           | GGCACTTGCGTGAATGTTGG        | 150                 | NM_010344.4                 |
|                            | Rev           | GGCATCCCTTTTCTGCTTGATG      |                     |                             |
| <i>Mmu_Gss</i>             | For           | TTGATATCTACAAGCAAGTCC       | 141                 | NM_008180.2                 |
|                            | Rev           | TGGCAGAGATAGTGTGATC         |                     |                             |
| <i>Mmu_Gstk1</i>           | For           | TATCACGGAGTATCAGAGCA        | 110                 | NM_029555.2                 |
|                            | Rev           | GCTTGTTCTTACCTGTTG          |                     |                             |
| <i>Mmu_Gstp1</i>           | For           | CTTGCTGTATGGGCAGCTC         | 227                 | NM_013541.1                 |
|                            | Rev           | GGCCTTCACGTATGTCATTCT       |                     |                             |
| <i>Mmu_Hcp1</i>            | For           | GATTGCTCTTCTGTCATTGG        | 158                 | NM_026740.2                 |
|                            | Rev           | CGGGTAGATGGAGTTGAAGAT       |                     |                             |
| <i>Mmu_Hmbs</i>            | For           | CTTTCCCTCTGGTCTTGCTTC       | 63                  | NM_001110251.1              |
|                            | Rev           | TTTGAGCCGTTTTCTTCCTT        |                     |                             |
| <i>Mmu_Hmox1</i>           | For           | CCTCACTGGCAGGAAATCATC       | 67                  | NM_010442.2                 |
|                            | Rev           | CCTCGTGGAGACGCTTTACATA      |                     |                             |
| <i>Mmu_Hmox2</i>           | For           | TGACCGAGCAGAAAATACCC        | 94                  | NM_001136066.2 <sup>a</sup> |
|                            | Rev           | GAAGTAAAGTGCAGTGGTGGC       |                     |                             |
| <i>Mmu_Hrg1</i>            | For           | CTCCATCTTCTCGTCTGGAC        | 106                 | NM_026353.4                 |
|                            | Rev           | CATCACGTGAGTCACCAAGA        |                     |                             |
| <i>Mmu_Mfsd7b (Flvcr1)</i> | For           | ATTGAATAAAATGCTCCAGTCATGA   | 80                  | NM_001081259.1 <sup>a</sup> |
|                            | Rev           | ATCTGGAACCTGTGCAGAAACA      |                     |                             |
| <i>Mmu_Nox4</i>            | For           | ATTTGCCTGGAAGAACCCAAG       | 101                 | NM_015760.5                 |
|                            | Rev           | CATCGGTAAAGTCTCTCCGCA       |                     |                             |
| <i>Mmu_Ppox</i>            | For           | CCTAGCAAAGTAAAGGGGTCA       | 198                 | NM_008911.2                 |
|                            | Rev           | ATGGTACTCAGGATTCGAGC        |                     |                             |
| <i>Mmu_Prdx3</i>           | For           | GTCATCTTGCCTGGATCAAC        | 103                 | NM_007452.2                 |
|                            | Rev           | CCGTAGTCTCGGGATATCTG        |                     |                             |
| <i>Mmu_Prdx4</i>           | For           | TCTGAATGACCTTCTGTCTG        | 139                 | NM_016764.4                 |
|                            | Rev           | AGCTGGATCTGGGATTATTGT       |                     |                             |
| <i>Mmu_Prdx5</i>           | For           | AAAGAAGCAGGTTGGGAGTGT       | 114                 | NM_012021.2                 |
|                            | Rev           | TTCCCCTTCAAATACCTCCACT      |                     |                             |

(continued)

SUPPLEMENTARY TABLE S1. (CONTINUED)

| <i>Gene</i>              | <i>Primer</i> | <i>Sequence 5'–3'</i>      | <i>Product [bp]</i> | <i>mRNA ID</i> |
|--------------------------|---------------|----------------------------|---------------------|----------------|
| <i>Mmu_Prdx6</i>         | For           | CTAACAAACATGCCTGTGACG      | 80                  | NM_007453.3    |
|                          | Rev           | AGGGTAGAGGATAGACAGC        |                     |                |
| <i>Mmu_S100a4 (Fsp1)</i> | For           | CTTCCACAAATACTCAGGCAAAGAGG | 141                 | NM_011311.2    |
|                          | Rev           | AAGTTGCTCATCACCTTCTGGAATGC |                     |                |
| <i>Mmu_Slc40a1 (Fpn)</i> | For           | GTTTGCAGGAGTCATTGCTGCTA    | 80                  | NM_016917.2    |
|                          | Rev           | TTACATTTTCTTGCAGCAACTGTGT  |                     |                |
| <i>Mmu_Sod2</i>          | For           | AGACCTGCCTTACGACTATG       | 163                 | NM_013671.3    |
|                          | Rev           | AGCGACCTGAGTTGTAACAT       |                     |                |
| <i>Mmu_Sod3</i>          | For           | ACTTCACCAGAGGGAAAGAG       | 87                  | NM_011435.3    |
|                          | Rev           | AGCAAGCCGTAGAACAAGAA       |                     |                |
| <i>Mmu_Txn1</i>          | For           | TCCCTCTGTGACAAGTATTCC      | 96                  | NM_011660.3    |
|                          | Rev           | CGGCATGCATTTGACTTCAC       |                     |                |
| <i>Mmu_Txnrd2</i>        | For           | GGCTGACTATGTGGAACCTT       | 230                 | NM_013711.3    |
|                          | Rev           | GATGACCCCAAGTCAAGGATTT     |                     |                |
| <i>Mmu_Txnrd3</i>        | For           | ACCTATGTCAACTCCTTCGG       | 97                  | NM_153162.3    |
|                          | Rev           | CAAACCTCGAAGCCGTGTAA       |                     |                |
| <i>Mmu_Txrdn1</i>        | For           | TGCGGTGGACACTCTACTAAG      | 165                 | NM_001042523.1 |
|                          | Rev           | GAAAACCTGGAAACCAGCAA       |                     |                |
| <i>Mmu_Uros</i>          | For           | GAAGCAGTGAAGCTGTGTTT       | 91                  | NM_009479.2    |
|                          | Rev           | CGTACACAGACTTGGCATT        |                     |                |
