# Supplementary material
Source: PubMed Central journal article supplement (PMC6003402)
Supplement: Supp_Table2.pdf [file Supp_Table2.pdf]

SUPPLEMENTARY TABLE S2. SEQUENCES OF PRIMERS USED FOR THE ANALYSES OF miRNA EXPRESSION

| <i>Gene</i>        | <i>Sequence 5'–3'</i>   |
|--------------------|-------------------------|
| <i>miR-21-5p</i>   | TAGCTTATCAGACTGATGTTGA  |
| <i>miR-31-5p</i>   | AGGCAAGATGCTGGCATAGCT   |
| <i>miR-150-5p</i>  | TCTCCAACCCTTGTACCAGTG   |
| <i>miR-301a-3p</i> | CAGTGCAATAGTATTGTCAAAGC |
| <i>miR-378a-3p</i> | CTGGACTTGGAGTCAGAAGG    |
| <i>miR-378a-5p</i> | CCTGACTCCAGGTCCTGTGT    |
| <i>U6 snRNA</i>    | CGCAAGGATGACACGCAAATTC  |
