# Supplementary material
Source: PubMed Central journal article supplement (PMC6003402)
Supplement: Supp_Table3.pdf [file Supp_Table3.pdf]

SUPPLEMENTARY TABLE S3. PCR SETTINGS FOR THE ANALYSIS OF mRNA AND miRNA LEVELS

| <i>mRNA/SYBR green</i>                     |                |                  |              |                   |
|--------------------------------------------|----------------|------------------|--------------|-------------------|
| <i>Hold</i>                                |                | <i>40 cycles</i> |              | <i>Melt curve</i> |
| 10 min<br>95°C                             | 30 s<br>95°C   | 60 s<br>60°C     | 45 s<br>72°C | —<br>60–95°C      |
| <i>mRNA (lipid-regulated genes)/TaqMan</i> |                |                  |              |                   |
| <i>Hold</i>                                | <i>Hold</i>    | <i>40 cycles</i> |              |                   |
| 2 min<br>50°C                              | 10 min<br>95°C | 15 s<br>95°C     | 60 s<br>60°C |                   |
| <i>miRNA/SYBR green</i>                    |                |                  |              |                   |
| <i>Hold</i>                                | <i>Hold</i>    | <i>40 cycles</i> |              | <i>Melt curve</i> |
| 2 min<br>50°C                              | 2 min<br>95°C  | 15 s<br>95°C     | 60 s<br>60°C | —<br>60–95°C      |
